# Supplementary material for: Molecular-level insight into the binding of arginine to a zwitterionic Langmuir monolayer
Source: Royal Society of Chemistry journal article supplement (doi:10.1039/c7ra05359b), 2017-01-01
Supplement: c7ra05359b1.pdf [file c7ra05359b1.pdf]

# Electronic Supplementary Information for Molecular-level insight into the binding of arginine to a zwitterionic Langmuir monolayer

Joaquín Klug<sup>\*a,b</sup>, Diego Masone<sup>a</sup>, and Mario G. Del Pópulo<sup>a,b</sup>

a- CONICET & Facultad de Ciencias Exactas y Naturales, Universidad Nacional de Cuyo, Mendoza, CP5500, Argentina; E-mail: mdelpopolo@fcen.uncu.edu.ar

b- Atomistic Simulation Centre, School of Mathematics and Physics, Queen's University Belfast, University Road, Belfast BT7 1NN, Northern Ireland; E-mail: m.delpopolo@qub.ac.uk

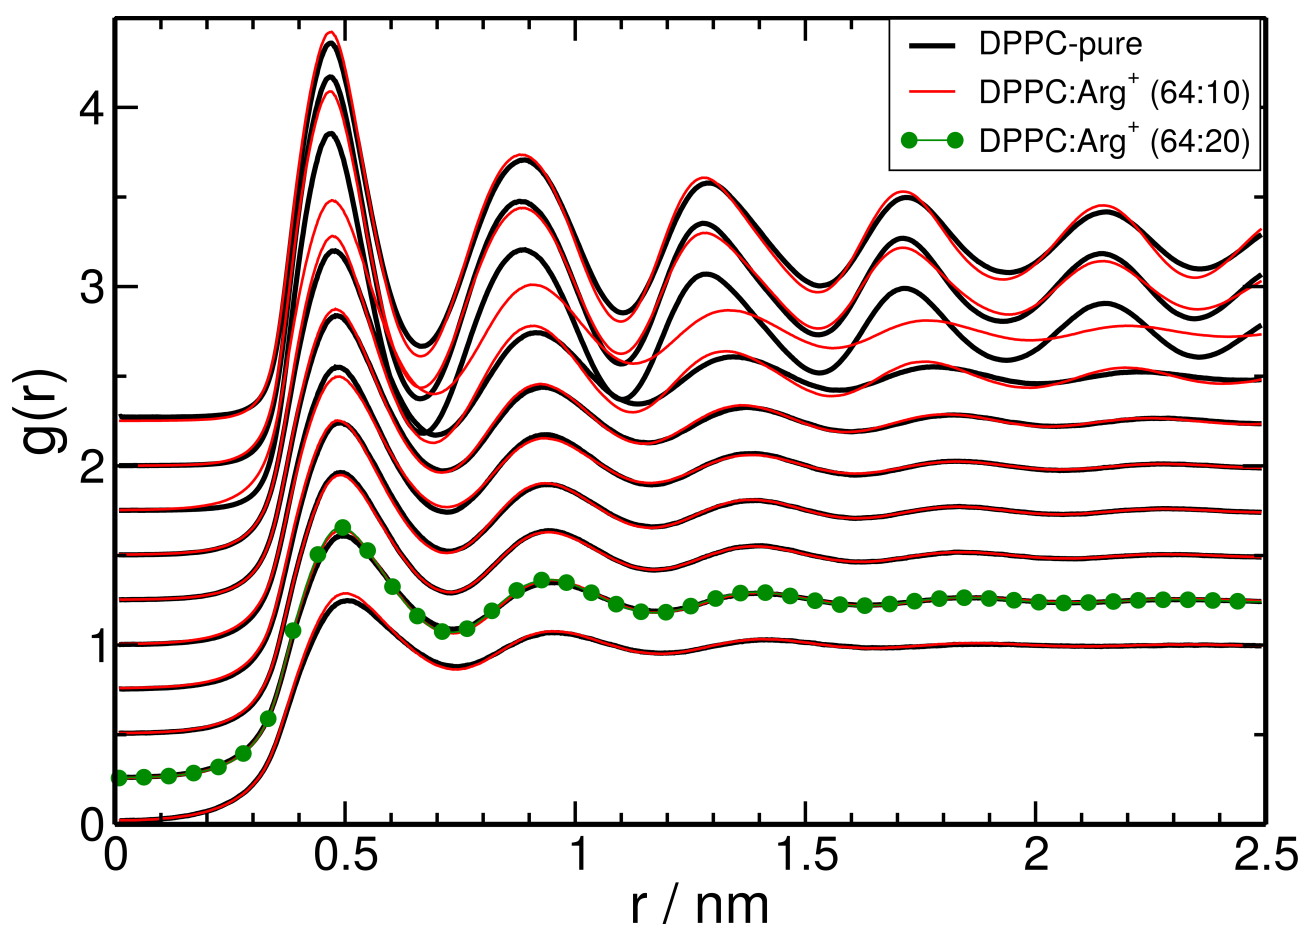

**Fig. S1** Radial distribution functions between the alkyl chains of a DPPC monolayer on pure water (black lines), and on an aqueous solution of ArgCl with a DPPC:Arg<sup>+</sup> ratio of 64:10 (red lines) or 64:20 (green line and dots). The different surface pressures are approximately 80, 70, 60, 50, 40, 30, 20, 10, 0, -10 mN m<sup>-1</sup> (from top to bottom).

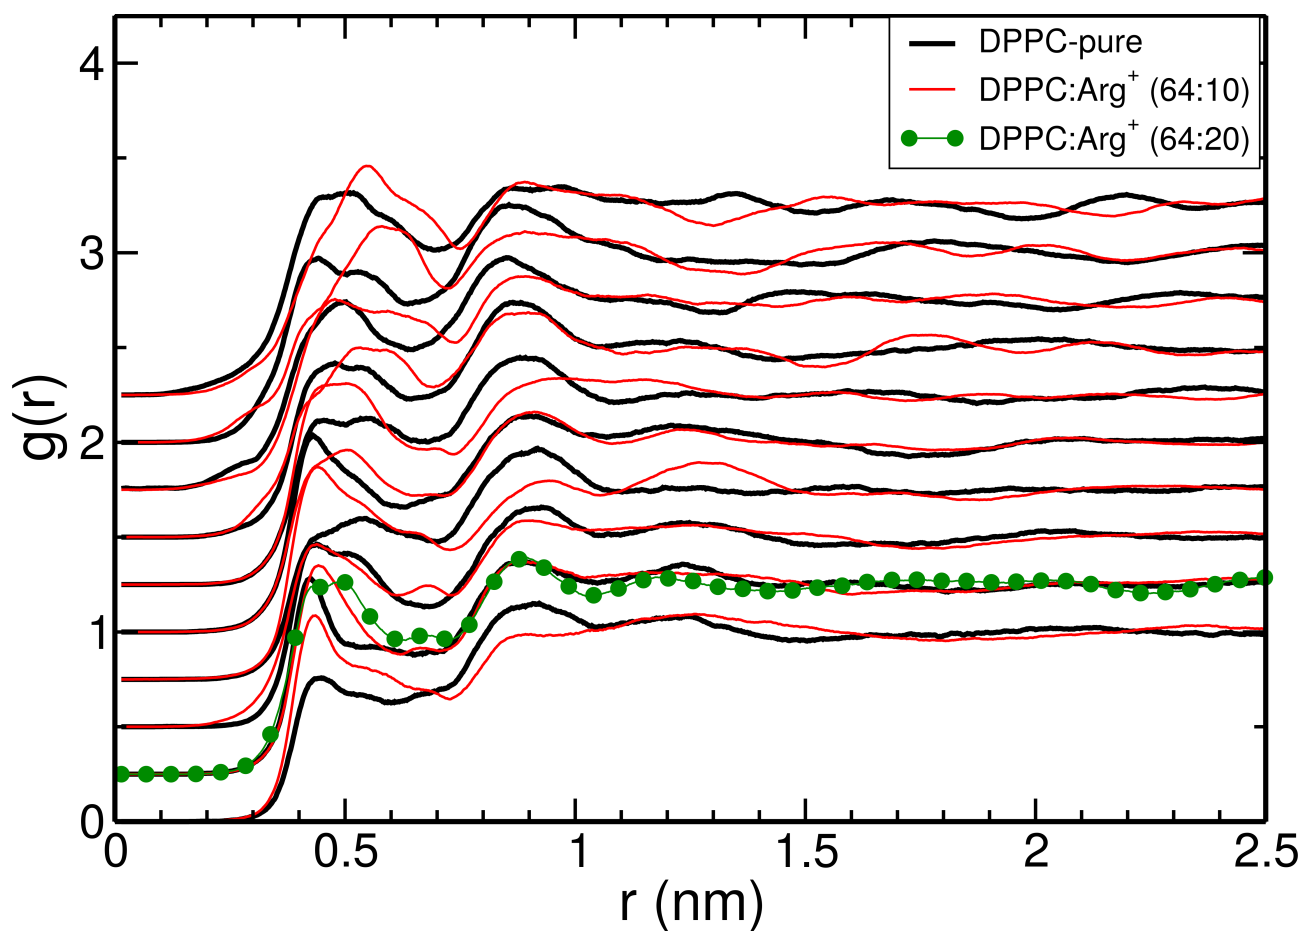

**Fig. S2** Radial distribution function between the lipids' head groups of a DPPC monolayer on pure water (black lines), and on an aqueous solution of ArgCl with a DPPC:Arg<sup>+</sup> ratio of 64:10 (red lines) or 64:20 (green line and dots). The different surface pressures are approximately 80, 70, 60, 50, 40, 30, 20, 10, 0, -10  $\text{mN m}^{-1}$  (from top to bottom).
